# Supplementary material for: Channel cross-section heterogeneity of particulate organic carbon transport in the Huanghe
Source: Copernicus journal article supplement (doi:10.5194/egusphere-2023-1045), 2023-06-14
Supplement: Supplementary file 1 [file Table_1.xlsx]

## Sheet: Sheet1
Table 1. SPM characteristics and POC properties of the river-cross-section sampling.
Sample	Type	Depth	SPM	POC	SD	δ13Corg	SD	Fm	Δ14C	14C age	TN	N/Corg	Al/Si	D50
ID		m	mg/L	(%)		(‰)			(‰)		(%)			μm
JB 1-1	SPM	0.5	679	0.44	0.02	−25.84	0.03	0.645	−360	3527	0.078	0.178	0.243	19.5
JB 1-2	SPM	2	757	0.45	0.01	−25.80	0.06	0.613	−392	3929	0.08	0.179	0.238	23.7
JB 1-3	SPM	3.5	1095	0.39	0.01	−26.13	0.04	0.675	−331	3161	0.077	0.197	0.216	34.5
JB 2-1	SPM	0.5	730	0.4	0.03	−26.00	0.01	0.631	−374	3703	0.069	0.175	0.255	39.8
JB 2-2	SPM	2	1124	0.32	0.01	−26.37	0.06	0.569	−436	4537	0.05	0.156	0.196	60.4
JB 2-3	SPM	3.5	1806	0.29	0.01	−26.53	0.06	0.552	−453	4779	0.042	0.144	0.172	86
JB 3-1	SPM	0.5	1058	0.32	0.02	−26.09	0.03	0.582	−422	4346	0.058	0.181	0.19	50.1
JB 3-2	SPM	2.2	2459	0.31	0.02	−26.55	0.04	0.589	−415	4247	0.049	0.159	0.186	73.1
JB 4-1	SPM	1	1747	0.41	0.02	−25.75	0.06	0.63	−375	3714	0.073	0.175	0.217	29
JB 5-1	SPM	0.5	1406	0.32	0.01	−26.12	0.05	0.589	−416	4256	0.061	0.188	0.186	58.2
HH 17.05	SPM	0	83	0.92	0	−25.73	0.14	0.711	−295	2740	0.184	0.2	0.358	5.2
HH 17.06	SPM	0	54	1.21	0.01	−25.60	0.07	0.729	−277	2539	0.261	0.215	0.377	4.3
HH	Bedload			0.21	0.03	−27.35	0.05	0.099	−901	18539	0.019	0.087	0.175	44.4
