# Supplementary material for: Channel cross-section heterogeneity of particulate organic carbon transport in the Huanghe
Source: Copernicus journal article supplement (doi:10.5194/egusphere-2023-1045), 2023-06-14
Supplement: Supplementary file 2 [file egusphere-2023-1045-supplement-version2.zip]

Archive with 4 entries (4 files):
- E-Surf SI.pdf
- Table_1.xlsx
- Table_S1.xlsx
- Table_S2.xlsx
