# Supplementary material for: Channel cross-section heterogeneity of particulate organic carbon transport in the Huanghe
Source: Copernicus journal article supplement (doi:10.5194/egusphere-2023-1045), 2023-06-14
Supplement: Supplementary file 2 [file egusphere-2023-1045-supplement-version2.zip › Table_S2.xlsx]

## Sheet: Sheet1
Table S2. Relative contributions of the three different sources of POC at the Luokou cross-section
Sample ID	Fractional proportions						OC content (%)
	OCts	SD	OClps	SD	OCpetro	SD	OCbio	SD	OCpetro	SD
JB 1-1	0.55	0.18	0.22	0.15	0.23	0.11	0.34	0.1	0.1	0.05
JB 1-2	0.52	0.18	0.23	0.16	0.25	0.11	0.33	0.11	0.11	0.05
JB 1-3	0.6	0.17	0.19	0.14	0.21	0.1	0.31	0.09	0.08	0.04
JB 2-1	0.55	0.17	0.21	0.15	0.25	0.11	0.3	0.09	0.1	0.04
JB 2-2	0.51	0.16	0.19	0.14	0.31	0.11	0.22	0.07	0.1	0.04
JB 2-3	0.5	0.15	0.18	0.13	0.33	0.11	0.2	0.06	0.1	0.03
JB 3-1	0.5	0.17	0.21	0.15	0.29	0.11	0.23	0.07	0.09	0.04
JB 3-2	0.54	0.15	0.17	0.13	0.29	0.11	0.22	0.06	0.09	0.03
JB 4-1	0.53	0.18	0.23	0.16	0.24	0.11	0.32	0.1	0.1	0.05
JB 5-1	0.51	0.16	0.2	0.14	0.28	0.11	0.23	0.07	0.09	0.04
HH 17.05	0.6	0.18	0.22	0.16	0.18	0.1	0.75	0.22	0.17	0.09
HH 17.06	0.6	0.19	0.23	0.17	0.17	0.1	1	0.31	0.21	0.12
HH	0.08	0.05	0.14	0.1	0.78	0.1	0.05	0.02	0.17	0.02
