# Supplementary material for: Channel cross-section heterogeneity of particulate organic carbon transport in the Huanghe
Source: Copernicus journal article supplement (doi:10.5194/egusphere-2023-1045), 2023-06-14
Supplement: Supplementary file 3 [file egusphere-2023-1045-supplement.zip]

Archive with 4 entries (4 files):
- EGUSPHERE-2023-1045_SI.pdf
- EGUSPHERE-2023-1045_Supporting_information_Table_S1.xlsx
- EGUSPHERE-2023-1045_Supporting_information_Table_S2.xlsx
- EGUSPHERE-2023-1045_Table_1.xlsx
